# Supplementary material
Source: MDPI journal article supplement (https://www.mdpi.com/2311-7524/10/3/222)
Supplement: s1 [file s1]

## Genetic Transformation of Potato without Antibiotic-Assisted Selection

Dmitry Miroshnichenko <sup>1,2,\*</sup>, Anna Klementyeva <sup>1</sup>, Tatiana Sidorova <sup>1</sup>, Alexander S. Pushin <sup>1,2</sup> and Sergey Dolgov <sup>1,2</sup>

<sup>1</sup> Branch of Shemyakin-Ovchinnikov Institute of Bioorganic Chemistry, Russian Academy of Science, Science Ave 6, 142290 Pushchino, Russia

<sup>2</sup> All-Russia Research Institute of Agricultural Biotechnology, Timiryazevskaya Street 42, 127550 Moscow, Russia

\* Correspondence: miroshnichenko@bibch.ru

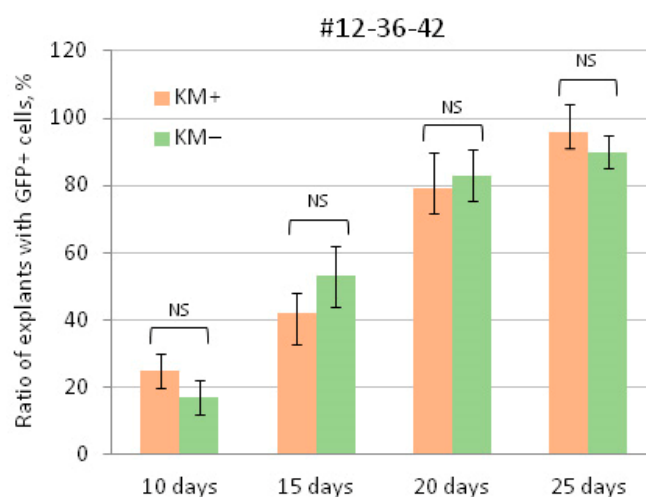

**Figure S1.** The percentage of explants displaying the GFP expression in cells of potato cv. #12-36-42 under selective- (Km+) and non-selective (KM-) cultivation. ns - indicate statistically non significant differences calculated according t-test ( $p \leq 0.05$ ).

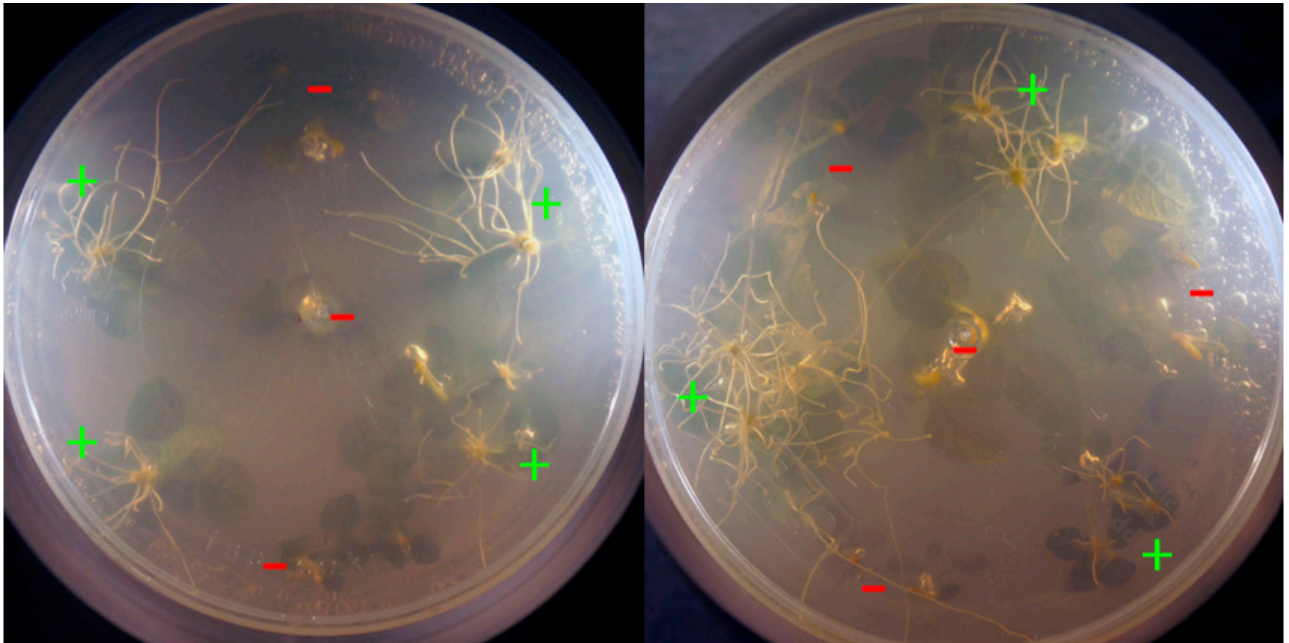

**Figure S2.** Identification of transgenic events by *in vitro* rooting of putative transgenic plants (cv. #12-36-42) on the medium, supplemented with a lethal dose of kanamycin ( $100 \text{ mg mg L}^{-1}$ ). "+" – indicated transgenic plants successfully rooted after 15 days of cultivation; "-" – indicated non-transgenic plants failed to rooting

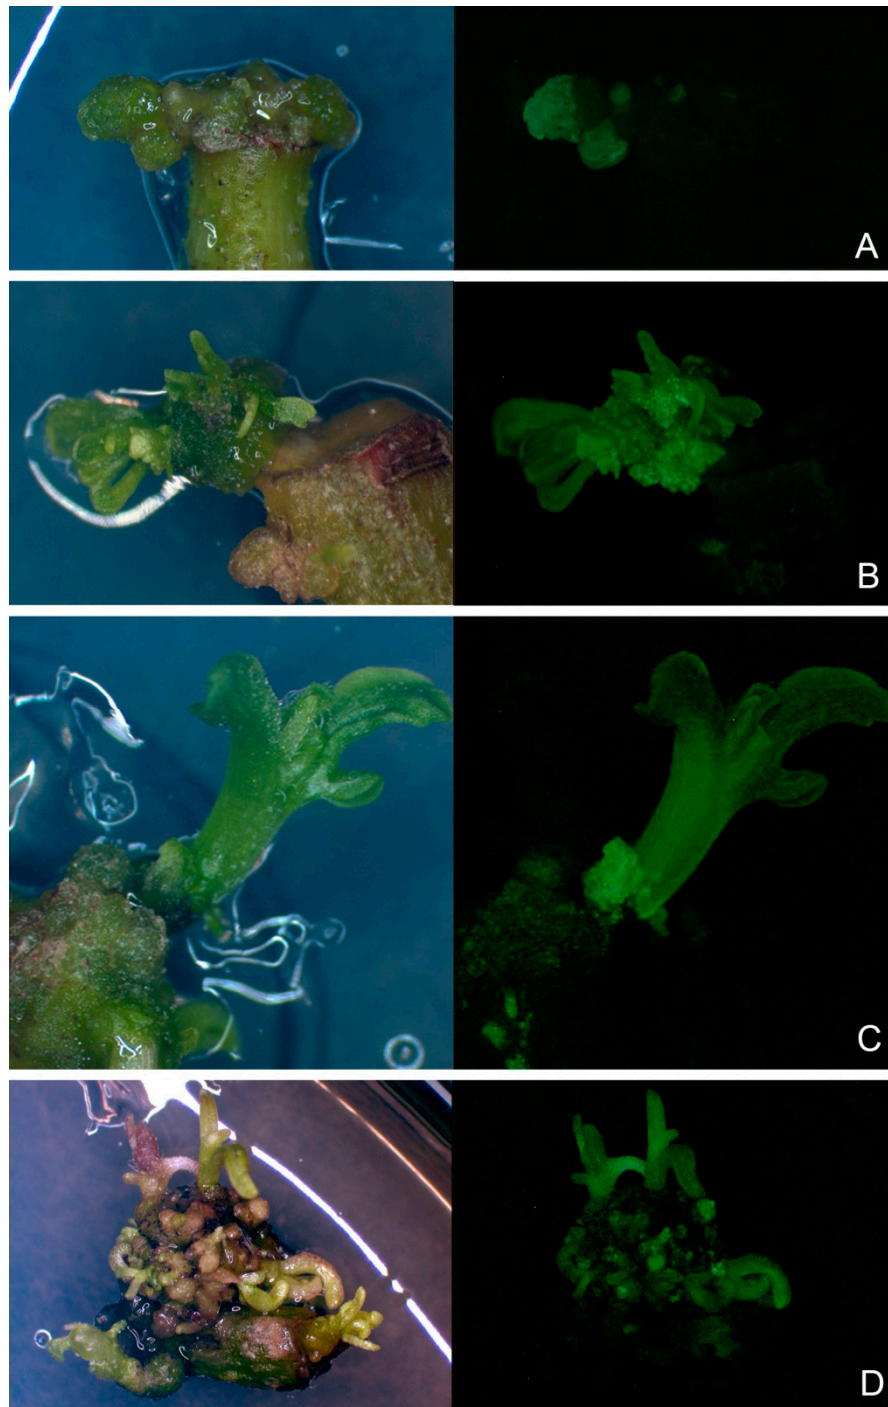

**Figure S3.** Regeneration of transgenic potato plants under kanamycin assisted conditions. (A) Formation of GFP expressing callus on the cut edge of explant of 'Chicago'; (B) Development of numerous transgenic buds and plantlets with the GFP expression from the callus of 'Chicago'; (C) Regeneration of the single transgenic plantlet of 'La Strada' with a intensive green fluorescence throughout all tissues; (D) development of multiple transgenic shoots of 'Pirol' from cultivated explant at 65 day after agrobacterial transformation.

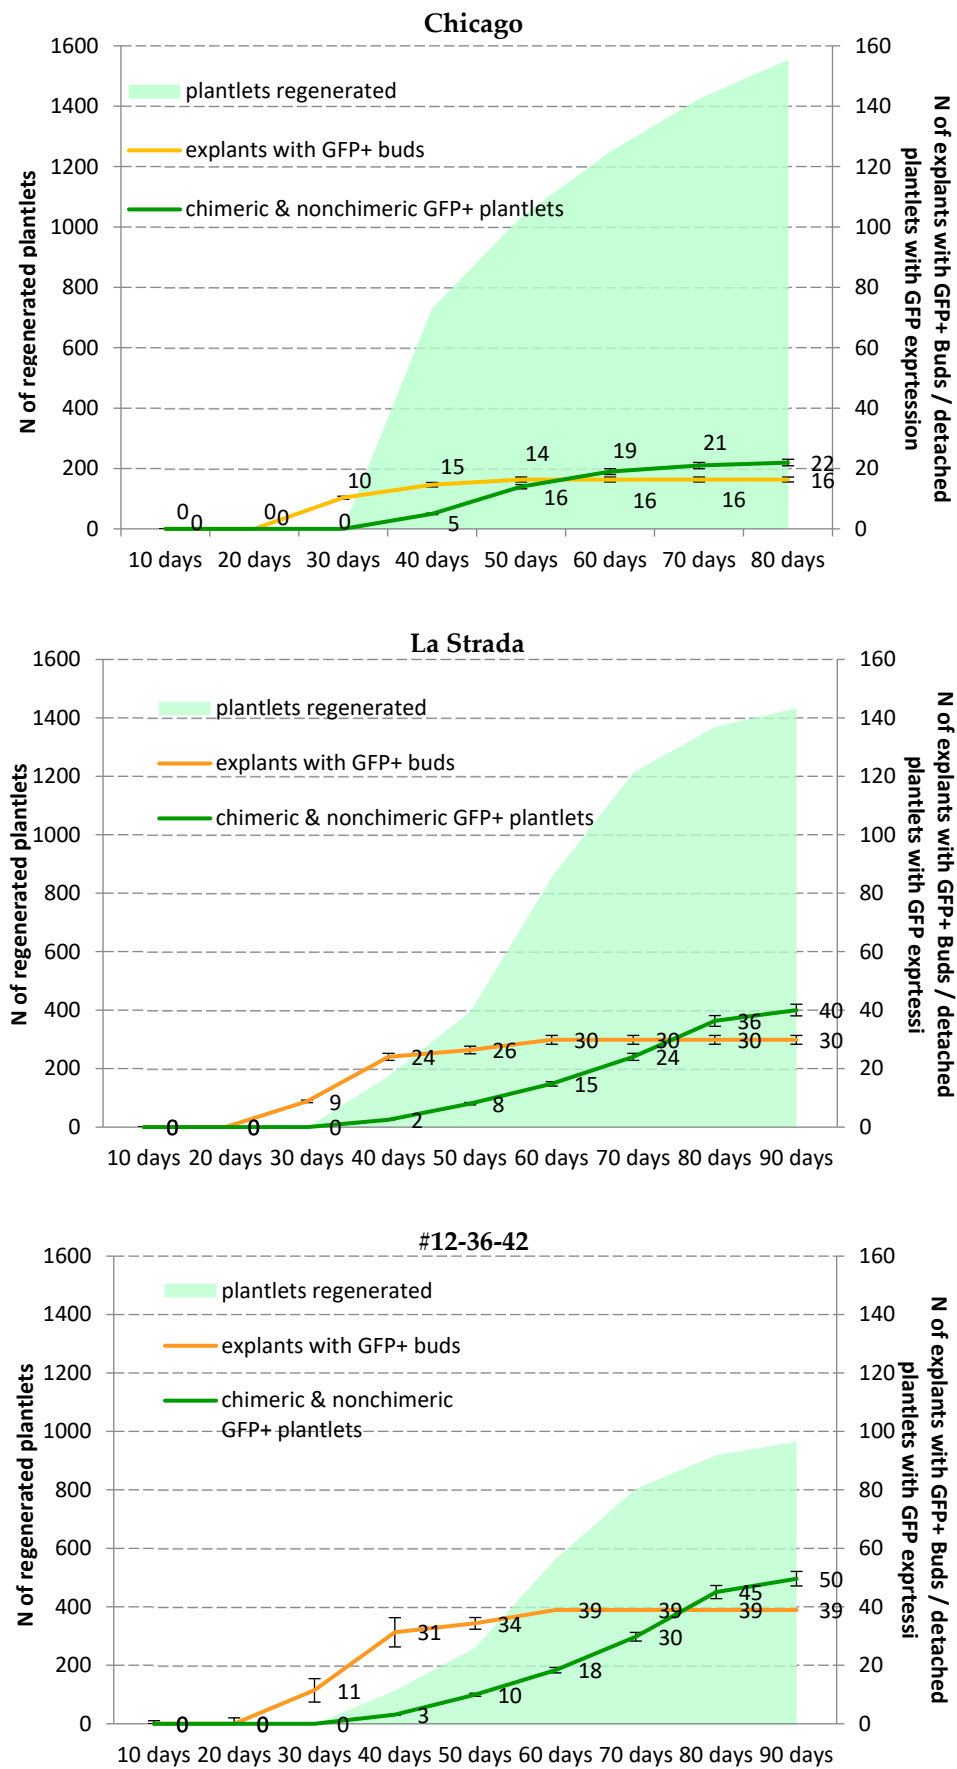

**Figure S4.** Genotype-dependant timeline for formation of GFP expressed buds and plantlets of 'Chicago' ('early/intermediate' type of regeneration), 'La Strada' ('intermediate' type of regeneration) and #12-36-42 (intermediate/late type of regeneration) under non selective conditions in comparison with the all regenerated shoots.

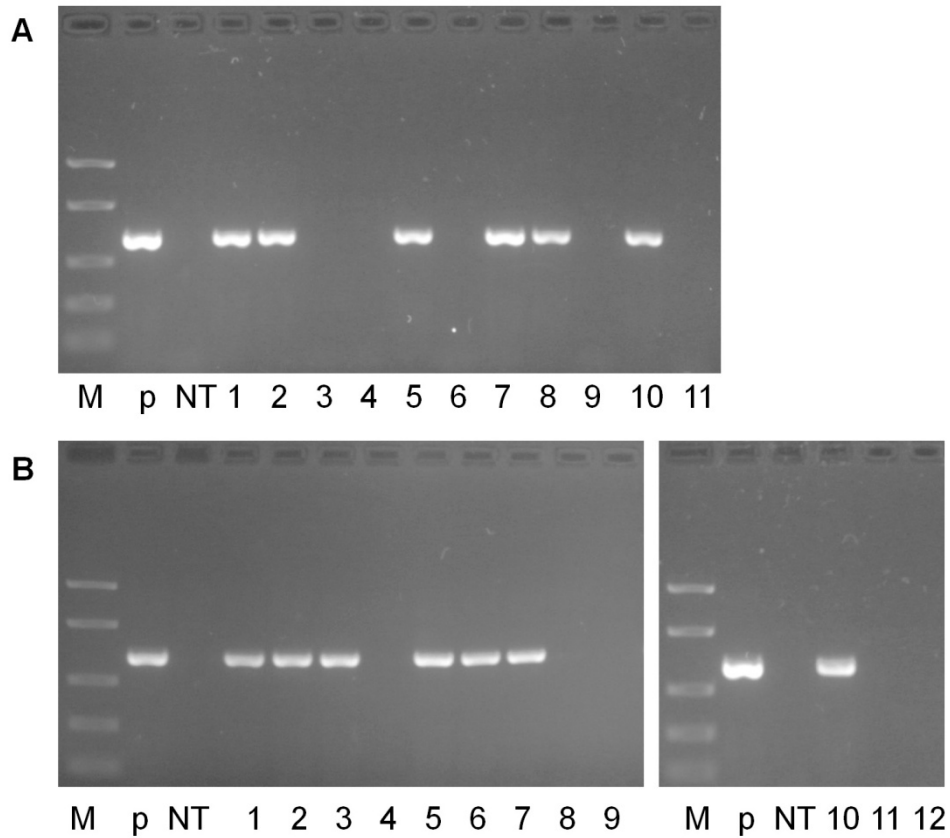

**Figure S5.** Putative transgenic plants of potato cv. 'Pirol' produced within experiments of antibiotic-free transformation are analyzed for the presence of *RFP* gene by PCR amplification; (A,B) examples of PCR analysis of plants collected in two independent experiments; lane M, DNA ladder as molecular weight marker; lane p, DNA of the plasmid; lane NT, non transgenic potato plant 'Pirol'; 1-12, putative transformant lines; the size of amplified fragment is 537 bp.
