# Supplementary material
Source: MDPI journal article supplement (https://www.mdpi.com/2311-7524/10/3/222)
Supplement: s1 [file s1]

Archive with 1 entries (1 files):
- horticulturae-2870614-supplementary.pdf
